# Supplementary material
Source: MDPI journal article supplement (https://www.mdpi.com/2297-8739/10/8/426)
Supplement: s1 [file s1 › separations-2486734-supplementary.pdf]

# Removal of Azo Dyes Orange II and Reactive Black 5 from Aqueous Solutions by Adsorption on Chitosan Beads Modified with Choline Chloride: Urea Deep Eutectic Solvent and FeO

Óscar Martínez-Rico, Lucía Blanco, Ángeles Domínguez and Begoña González

Chemical Engineering Department, Universidade de Vigo, 36310 Vigo, Spain

## Supplementary information

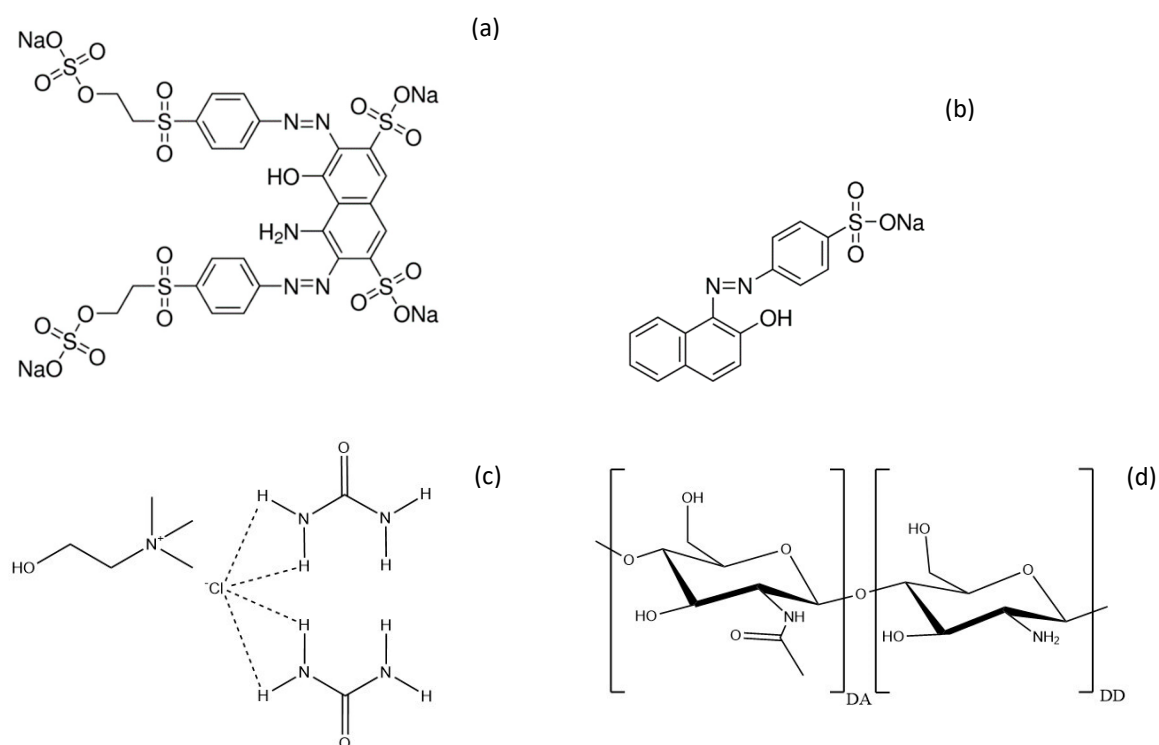

Figure S1: Structures of the dyes RB5 (a) and OII (b), the proposed structure for choline chloride:urea 1:2 eutectic mixture (Longo and Craveiro, 2018) (c), and chitosan structure (d).

Table S1: Compounds used in this study and specifications -(chemical name, supplier, purity provided by supplier and CAS number).

| Chemical name                        | Supplier          | Purity  | CAS number |
|--------------------------------------|-------------------|---------|------------|
| Chitosan                             | Acros Organics    | -       | 9012-76-4  |
| Choline chloride                     | Acros Organics    | 99%     | 67-48-1    |
| Urea                                 | Labkem            | 98-102% | 57-13-6    |
| Reactive Black 5                     | Sigma Aldrich     | 50%     | 17095-24-8 |
| Orange II                            | Acros Organics    | 100%    | 633-96-5   |
| NaOH                                 | Fisher Scientific | ≥ 97%   | 1310-73-2  |
| FeCl <sub>3</sub> ·6H <sub>2</sub> O | Honeywell, Fluka  | 97%     | 10025-77-1 |

|                                      |                  |                              |            |
|--------------------------------------|------------------|------------------------------|------------|
| FeCl <sub>2</sub> ·4H <sub>2</sub> O | Honeywell, Fluka | ≥ 99%                        | 13478-10-9 |
| EDTA                                 | Sigma-Aldrich    | ≥ 97.0%                      | 6381-92-6  |
| DMSO                                 | Merck            | ≥ 99.9%                      | 67-68-5    |
| Ethanol absolute                     | Scharlau         | 99.9%                        | 64-17-5    |
| Acetic acid<br>glacial               | Labkem           | 99.8%                        | 64-19-7    |
| Sulfuric acid                        | Labkem           | > 95%                        | 7664-93-9  |
| Hydrochloric acid                    | VWR              | 37%                          | 7647-01-0  |
| Ammonium<br>hydroxide                | Sigma-Aldrich    | 25% NH <sub>3</sub><br>basis | 1336-21-6  |
| NaCl                                 | Merck            |                              | 7647-14-5  |

## 2.5. Adsorption isotherm

Langmuir, Freundlich and Temkin isotherm models have been used to study the affinity, trend, and adsorption mechanism of the dye towards sorbent. Equations S1 – S3 represent the mentioned models, respectively:

$$\frac{C_e}{q_e} = \frac{1}{q_m K_L} + \frac{C_e}{q_m} \quad (S1)$$

$$\log q_e = \log k_F + \frac{1}{n} \log C_e \quad (S2)$$

$$q_e = B \ln K_T + B \ln C_e \quad (S3)$$

$C_e$  is concentration of adsorbate at equilibrium (final concentration of solute (mg/L)/liquid-phase concentrations of dye at equilibrium);  $q_e$  is the amount of dye adsorbed at equilibrium (mg/g);  $K_L$  (L/mg or L/mol) is the Langmuir constant related to adsorption capacity (mg g<sup>-1</sup>), which can be correlated with the variation of the suitable area and porosity of the adsorbent, implying that large surface area and pore volume will result in higher adsorption capacity. It is calculated from the intercept of the different straight lines (linear plot of  $C_e/q_e$  vs.  $C_e$ ) at different temperatures.  $K_F$ , Freundlich constant (L/g), is related to the adsorption capacity, and  $1/n$  is a function of the strength of adsorption, indicating the affinity between the adsorbent and adsorbate. A value of  $1/n$  below unity would imply a chemical process, and above unity, a physical process; it also indicates the heterogeneity of the surface: the more heterogeneous the surface, the more the  $1/n$  value approaches zero (Vinay 2014).  $K_T$  is Temkin isotherm constant (L g<sup>-1</sup>).  $T$  (K) is the absolute temperature.  $R$  represents the universal gas constant (8.314 J mol<sup>-1</sup>K<sup>-1</sup>).  $B = RT/b$  is a constant which is related to the heat of adsorption (J mol<sup>-1</sup>);  $q_m$  is the maximum amount of dye adsorbed (mg/g) / maximum monolayer adsorption capacity (calculated from the slope of the different straight lines at different temperatures).

The value of the dimensionless constant called the separation factor  $R_L$ , based on the following equation (S4) could be used to predict the degree of favourability of the Langmuir isotherm for equilibrium data:

$$R_L = \frac{1}{1 + K_L C_{max}} \quad (S4)$$

$K_L$  is Langmuir's constant and  $C_{max}$  is the highest initial dye concentration.  $R_L$  values indicate the adsorption to be unfavourable when  $R_L > 1$ , linear when  $R_L = 1$ , favourable when  $0 < R_L < 1$ , and irreversible when  $R_L = 0$ .

## 2.6 Adsorption kinetics models:

The adsorption kinetic models used were pseudo-first and pseudo-second order models (Eq. S5 and S6, respectively), Elovich kinetic model (Eq. S7) and intraparticle diffusion (Eq. S8)

$$\ln(q_e - q_t) = \ln q_e - k_1 t \quad (S5)$$

$$\frac{t}{q_t} = \frac{1}{k_2 q_e^2} + \frac{t}{q_e} \quad (S6)$$

$$q_t = \frac{1}{\beta} \ln \alpha \beta + \frac{1}{\beta} \ln t \quad (S7)$$

$$q_t = k_3 t^{\frac{1}{2}} + I \quad (S8)$$

Where:  $q_e$  and  $q_t$  are the adsorbed dye at equilibrium and time  $t$ ;  $K_1$  ( $\text{min}^{-1}$ ) denotes the pseudo-first-order rate constant,  $K_2$  ( $\text{g mg}^{-1}\text{min}^{-1}$ ) denotes the pseudo-second-order rate constant;  $K_3$  symbolizes the intraparticle propagation rate constant;  $I$  is a constant and is associated with the boundary layer thickness (Soliman et al. 2021);  $\alpha$  implies the adsorption rate at time = 0 min;  $\beta$  represents the coverage extent.

#### *Adsorption experiments*

The data were presented as mean values  $\pm$  standard error of the mean calculated as follows (eq S9):

$$\text{Standard error of the mean} = \frac{\text{standard deviation}}{\sqrt{n}} \quad (S9)$$

Where  $n$  is the sample size (number of individual observations) and standard deviation is calculated as follows (eq S10):

$$\text{Standard deviation} = \sqrt{\frac{\sum (x - \bar{x})^2}{n - 1}} \quad (S10)$$

Where  $\bar{x}$  is the mean value of the  $n$  individual observations ( $x$ ).

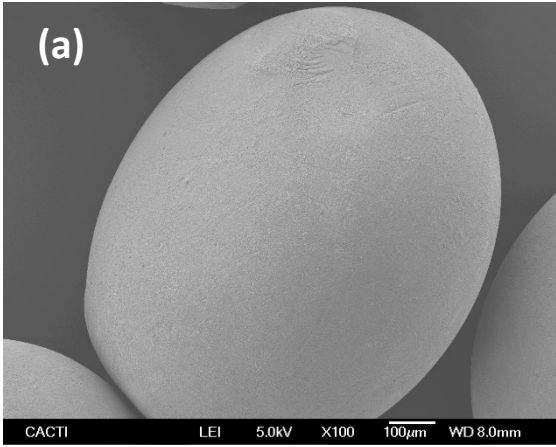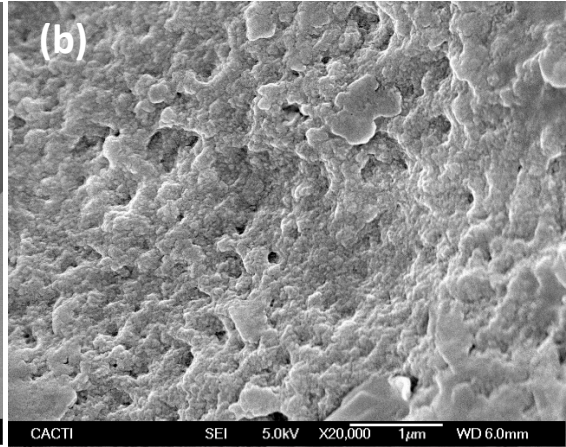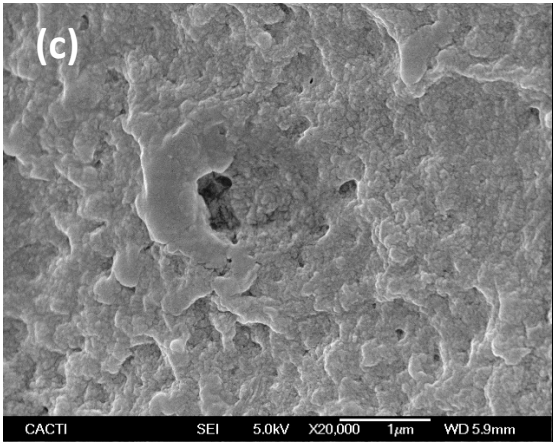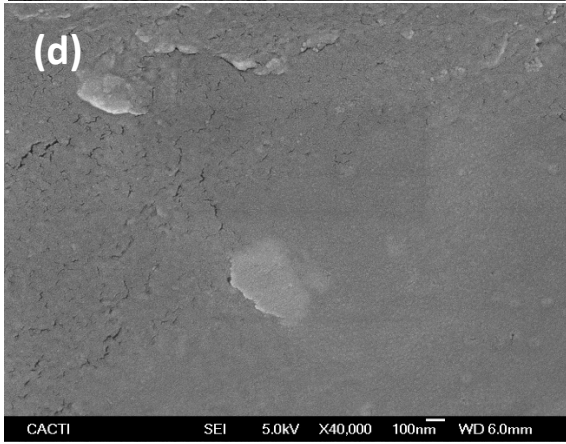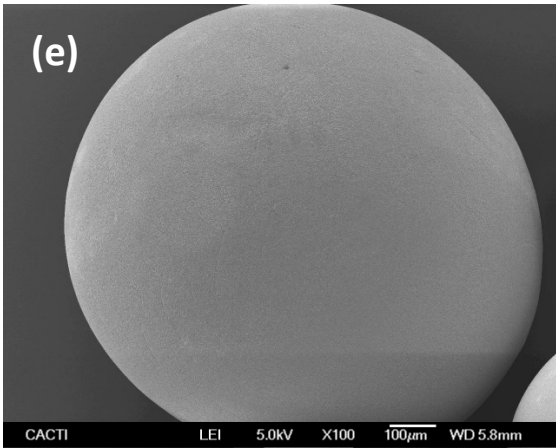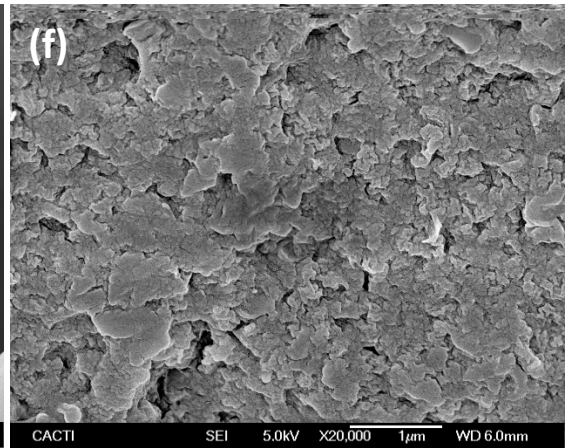

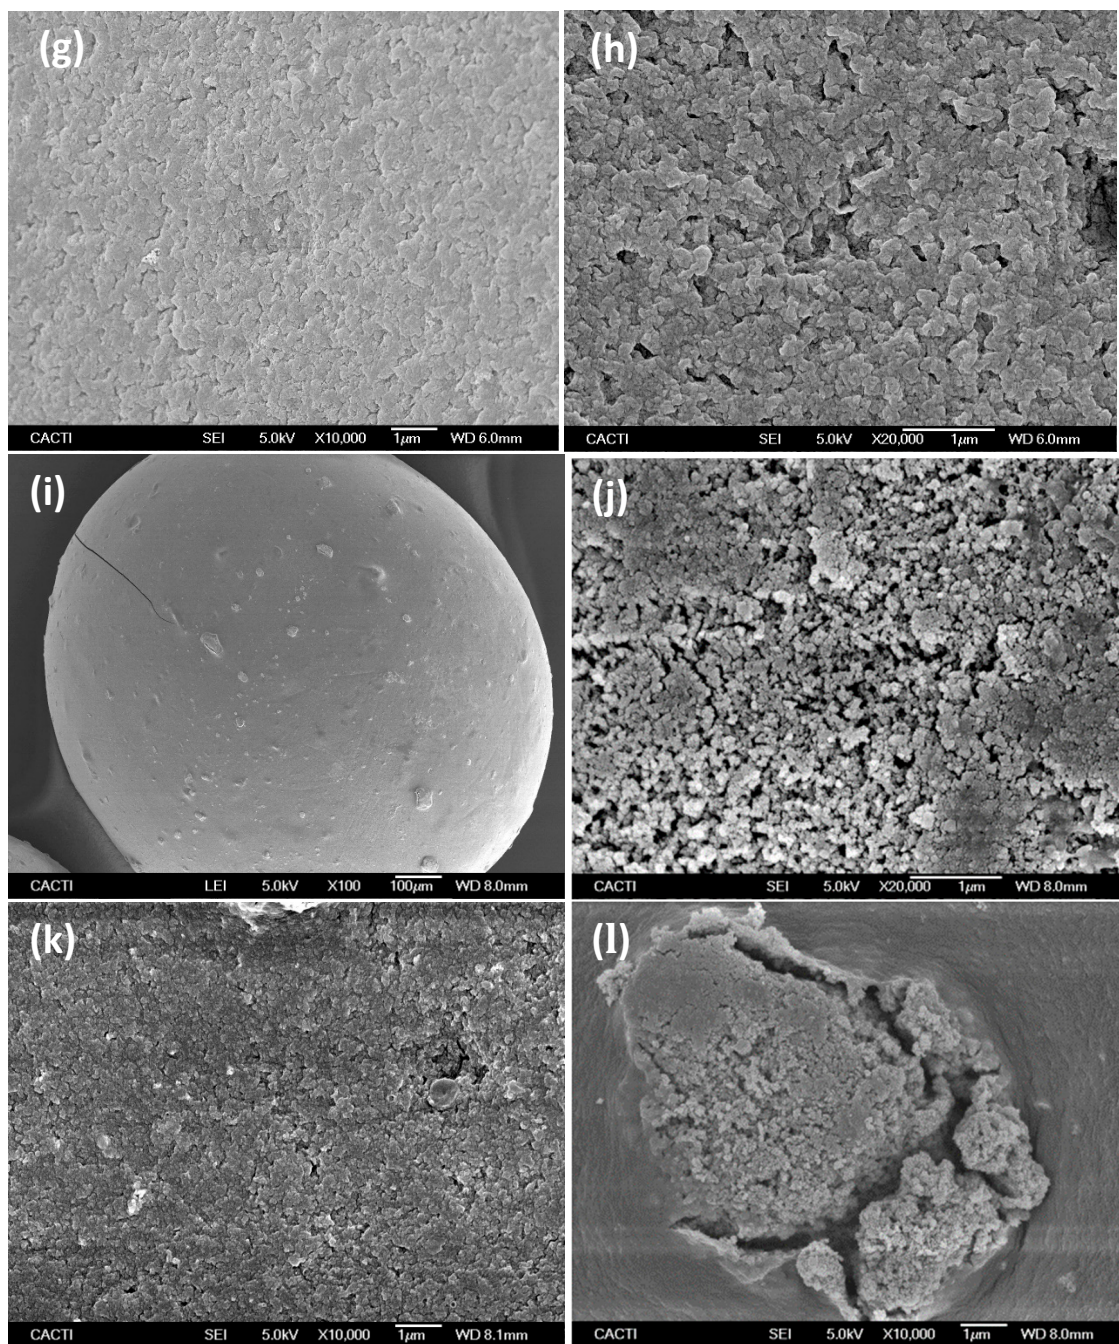

Figure S2: Images of the surface of the adsorbents obtained by scanning electron microscopy (SEM): (a-d) unmodified chitosan beads (un-Ch), (e-h) chitosan-DES beads (Ch-DES) and (i-l) chitosan-FeO-DES beads (Ch-FeO-DES).

Table S2: the main functional groups observed in the individual components of un-Ch and Ch-DES beads by FTIR analysis.

| Compound | Region (cm <sup>-1</sup> ) | Functional groups | Comments                                |
|----------|----------------------------|-------------------|-----------------------------------------|
| Chitosan |                            |                   |                                         |
|          | 3294-3352                  | N-H and O-H       | N-H and O-H Stretching vibration        |
|          | 2875-2920                  | C-H               | CH, CH <sub>2</sub> and CH <sub>3</sub> |

|                     |                   |                |                                                                                                                      |
|---------------------|-------------------|----------------|----------------------------------------------------------------------------------------------------------------------|
|                     | 1025, 1059        | C-O-C and C-OH | Stretching vibrations                                                                                                |
|                     | 1592, 1645        | N-H, C=O       | N-H bending, C=O stretching vibration Amide I (CONH <sub>2</sub> ) and II (N-H)<br>Ionic cross-linking (acetic acid) |
| Choline chloride    |                   |                |                                                                                                                      |
|                     | 3006-3026<br>3219 | N-H            | Stretching vibration                                                                                                 |
|                     | 1413-1481         | C-H            | bending of aliphatic C-H groups                                                                                      |
|                     | 1480-1390         | N-H            | N-H vibrations in quaternary ammonium groups                                                                         |
|                     | 1200-880          | C-N            | asymmetric C-N stretching vibration                                                                                  |
|                     | 2854-2951         | C-H            | Stretching vibrations of C-H in CH <sub>2</sub> and CH <sub>3</sub>                                                  |
| Urea                |                   |                |                                                                                                                      |
|                     | 3425-3326         | N-H            | asymmetric N-H stretching vibration of NH <sub>2</sub> groups                                                        |
|                     | 3228-3254         | N-H            | symmetric N-H stretching vibration of NH <sub>2</sub> groups                                                         |
|                     | 1674              | C=O            | stretching vibration of C=O in amide group (CONH <sub>2</sub> ) (amide I band)                                       |
|                     | 1587              | N-H            | bending of N-H bond in NH <sub>2</sub> groups (amide II band)                                                        |
|                     | 1459, 1147        | N-C-N          | asymmetric and symmetric stretching vibration of N-C-N bonds                                                         |
| DES ChCl:Urea (1:2) |                   |                |                                                                                                                      |
|                     | 3500-3000         |                | Broadening of the bands due to hydrogen bonds between acceptor and donor                                             |
|                     | 3388 and 3314     | N-H and O-H    | stretching vibration of N-H and O-H bonds                                                                            |
|                     | 3256 and 3187     | N-H            | stretching vibration of N-H                                                                                          |
|                     | 1660              | C=O            | Shift to lower frequencies (C=O stretching vibration band of amide group CONH)                                       |

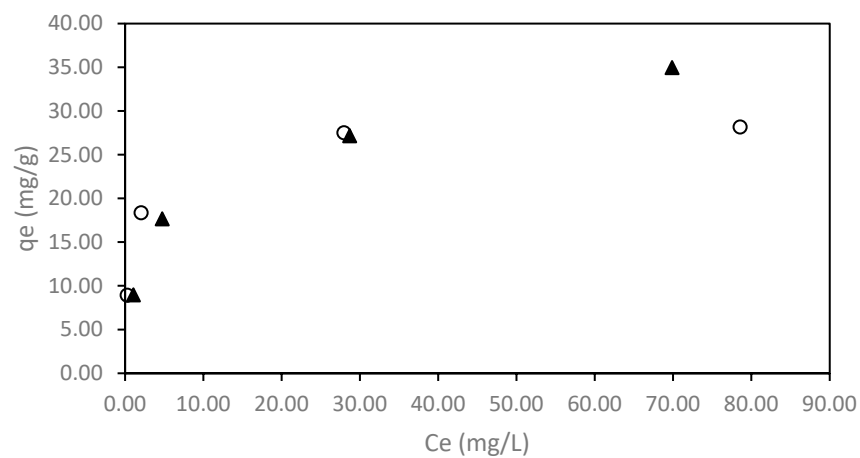

Figure S3. Adsorption isotherms for the adsorption of OII (○) and RB5 (▲) by 15 mg of Ch-DES beads at 298K.

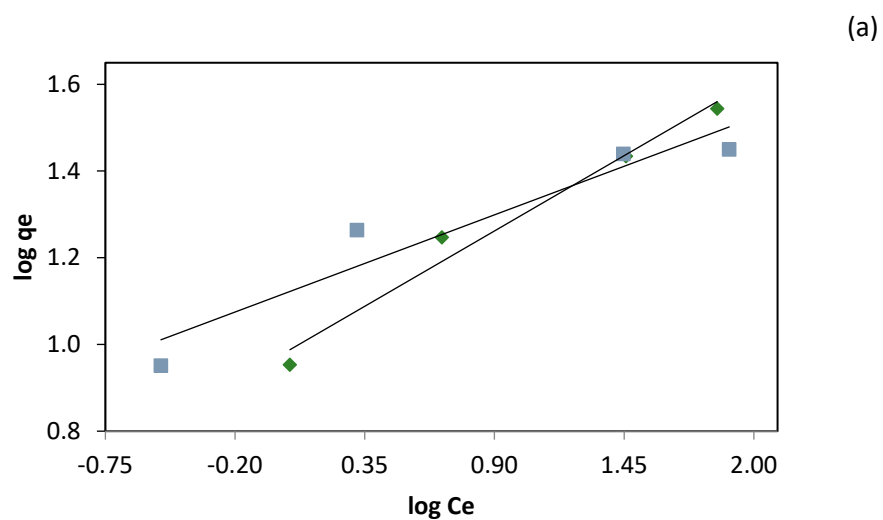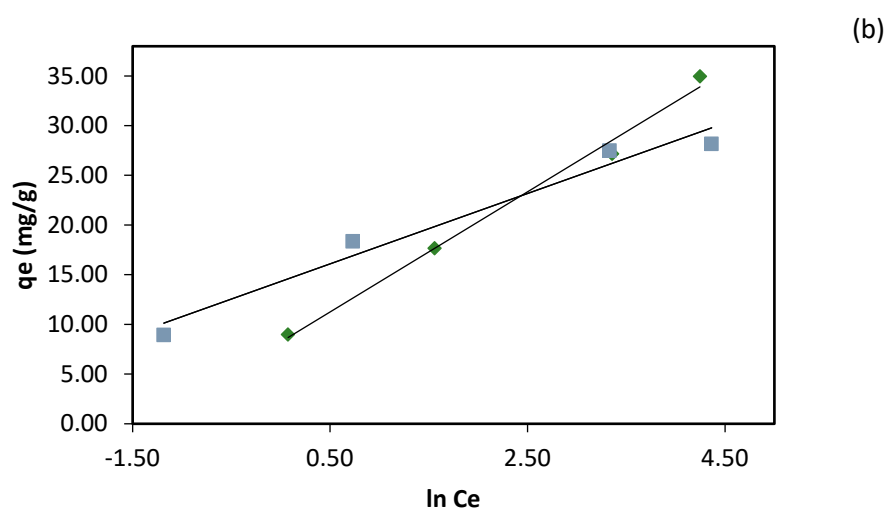

Figure S4: Freundlich (a) and Temkin (b) isotherms for the adsorption of OII (◆) and RB5 (■) by 15 mg of Ch-DES beads at 298 K.

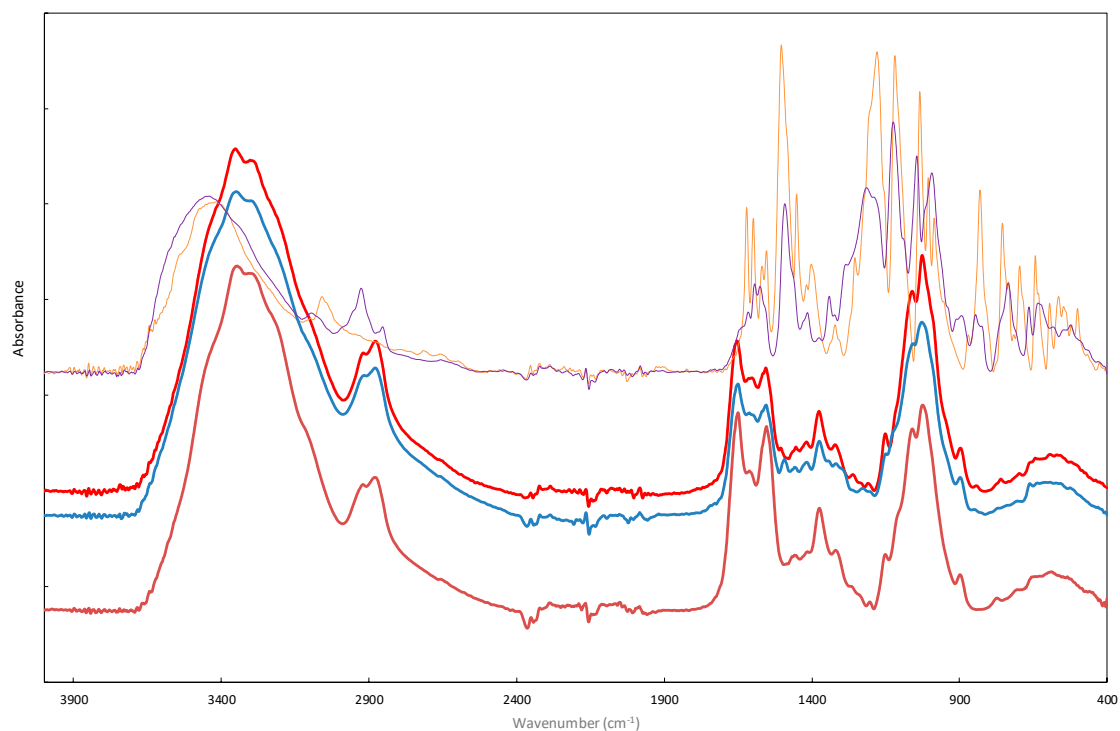

Figure S5: Fourier transform infrared (FTIR) spectra obtained after the adsorption of the dye OII onto DES-modified chitosan (— Ch-DES-OII) beads and the dye RB5 onto DES-modified chitosan (— Ch-DES-RB5) beads compared to the spectra of the adsorbent before adsorption (— Ch-DES beads), and the spectra of the dyes OII (—) and RB5 (—).
